# Supplementary material
Source: Springer Nature journal article supplement (https://www.springermedizin.de/resource/supplementary/12943_2013_1221_MOESM7_ESM.pdf/9552414)

**Promoter: BAX****p21(CDKN1A)****PUMA****TCF3 Intron 1**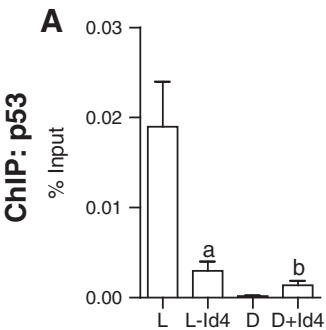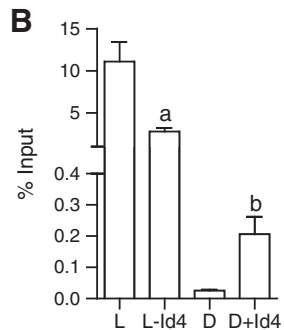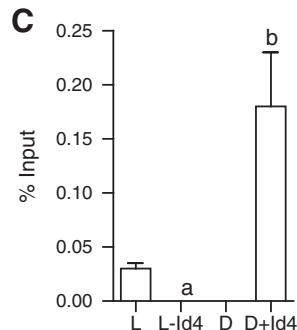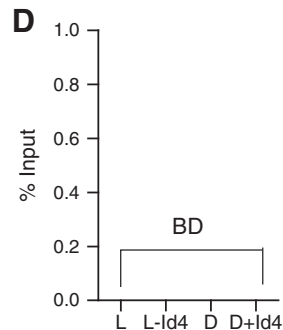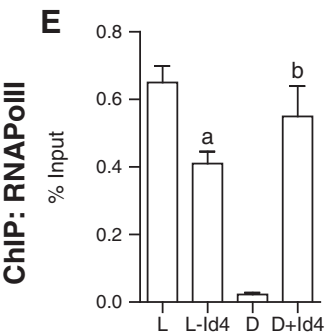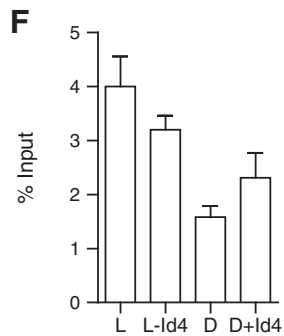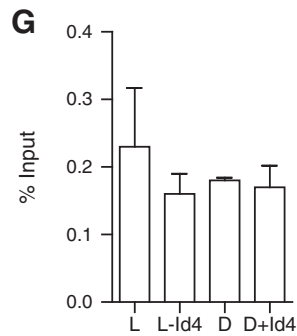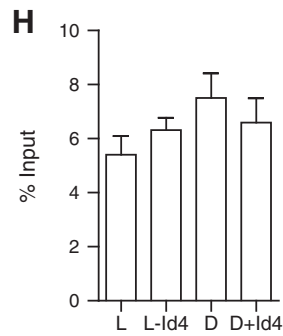

Supplement: MOESM7 [file 9552414]
